# Supplementary material
Source: Springer Nature journal article supplement (https://www.springermedizin.de/resource/supplementary/12978_2011_142_MOESM1_ESM.pdf/9603016)

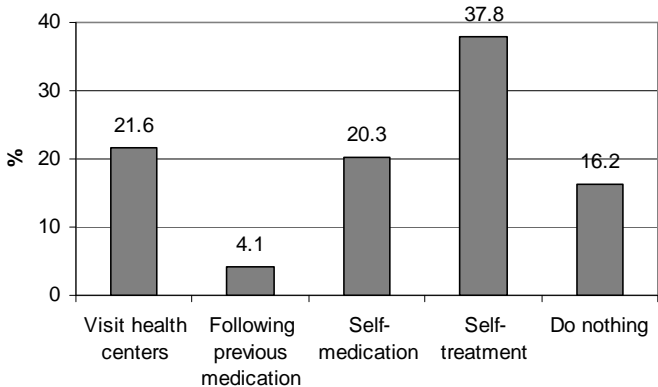

Supplement: MOESM1 [file 9603016]
